# Supplementary material
Source: Springer Nature journal article supplement (https://www.springermedizin.de/resource/supplementary/12891_2011_1640_MOESM4_ESM.pdf/9509042)
Supplement: MOESM4 [file 9509042]

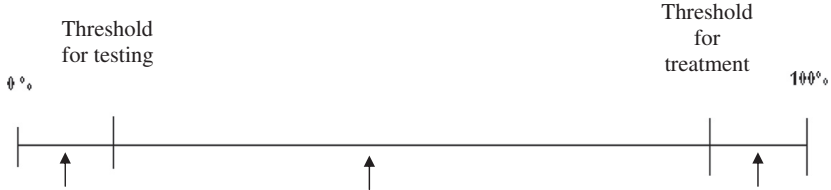

No testing required as the disease probability is below the testing threshold

The probability is between test and treatment thresholds and therefore further testing is required

Testing is complete and treatment begins; because disease probability is above treatment threshold
